# Supplementary material for: SPONTANEOUS MUTATION ACCUMULATION IN MULTIPLE STRAINS OF THE GREEN ALGA, CHLAMYDOMONAS REINHARDTII
Source: PubMed Central journal article supplement (PMC4277324; doi:10.1111/evo.12448), 2014-07-09
Supplement: evo0068-2589-sd1.pdf [file evo0068-2589-sd1.pdf]

## Supporting Information

**Table S1**

Summary of the estimates of the number of divisions on plates over 4 and 5 days of growth and fitness in liquid media for each MA line and the ancestral strains. The  $\mu_{\max}$  shown for the ancestors is the average of 9 pseudolines. Missing values correspond to cases where the lines failed to grow from their frozen stocks. In cases where a replicate assay failed, the standard error for G cannot be calculated, and is indicated by (\*) in the table.

| Line       | Total transfers of MA | Number of generations on plates in 4 days (se) | Number of generations on plates in 5 days (se) | Total estimated generations of MA | $\mu_{\max}$ 1st fitness assay | $\mu_{\max}$ 2nd fitness assay | Average $\mu_{\max}$ of both fitness assays |
|------------|-----------------------|------------------------------------------------|------------------------------------------------|-----------------------------------|--------------------------------|--------------------------------|---------------------------------------------|
| 1373 Anc   | 0                     | 6.47 (*)                                       | 10.20 (0.77)                                   | 0                                 | 0.082                          | 0.070                          | 0.076                                       |
| CC-1373 1  | 85                    | 8.08 (*)                                       | 10.29(*)                                       | 771                               | 0.095                          | 0.082                          | 0.088                                       |
| CC-1373 2  | 74                    | 8.06 (*)                                       | 10.87 (0.35)                                   | 683                               | 0.060                          | 0.073                          | 0.066                                       |
| CC-1373 3  | 72                    | 8.59 (*)                                       | 11.13 (1.69)                                   | 678                               | 0.104                          | 0.094                          | 0.099                                       |
| CC-1373 4  | 80                    | 6.79 (*)                                       | 9.59 (*)                                       | 689                               | 0.045                          | 0.079                          | 0.062                                       |
| CC-1373 5  | 77                    | 6.97 (*)                                       | 10.68 (1.71)                                   | 693                               | 0.080                          | 0.110                          | 0.095                                       |
| CC-1373 6  | 84                    | 8.36 (0.40)                                    | 9.66 (0.99)                                    | 749                               | 0.082                          | 0.081                          | 0.081                                       |
| CC-1373 7  | 82                    | 8.90 (0.57)                                    | 10.77 (0.40)                                   | 766                               | 0.093                          | 0.088                          | 0.090                                       |
| CC-1373 8  | 80                    | 8.55 (0.27)                                    | 10.02 (1.19)                                   | 725                               | 0.086                          | 0.080                          | 0.083                                       |
| CC-1373 9  | 79                    | -                                              | -                                              | -                                 | -                              | -                              | -                                           |
| CC-1373 10 | 82                    | 5.86 (*)                                       | 7.29 (*)                                       | 630                               | 0.057                          | 0.061                          | 0.059                                       |
| CC-1373 11 | 82                    | 8.79 (0.75)                                    | 10.24 (1.18)                                   | 751                               | 0.108                          | 0.058                          | 0.083                                       |
| CC-1373 12 | 79                    | -                                              | -                                              | -                                 | -                              | -                              | -                                           |
| CC-1373 13 | 82                    | 9.39 (0.86)                                    | 10.78 (0.45)                                   | 773                               | 0.066                          | 0.087                          | 0.077                                       |
| CC-1373 14 | 81                    | 6.41 (*)                                       | 11.03 (1.11)                                   | 732                               | 0.057                          | 0.067                          | 0.062                                       |
| CC-1373 15 | 23                    | 8.55(0.58)                                     | 11.22 (0.23)                                   | 198                               | 0.093                          | 0.058                          | 0.076                                       |

| Line       | Total transfers of MA | Number of generations on plates in 4 days (se) | Number of generations on plates in 5 days (se) | Total estimated generations of MA | $\mu_{\max}$ 1st fitness assay | $\mu_{\max}$ 2nd fitness assay | Average $\mu_{\max}$ of both fitness assays |
|------------|-----------------------|------------------------------------------------|------------------------------------------------|-----------------------------------|--------------------------------|--------------------------------|---------------------------------------------|
| 1952 Anc   | 0                     | 12.39 (1.92)                                   | 14.34 (0.63)                                   | 0                                 | 0.153                          | 0.130                          | 0.141                                       |
| CC-1952 1  | 85                    | 11.86 (1.40)                                   | 13.83 (0.73)                                   | 1074                              | -                              | 0.094                          | 0.094                                       |
| CC-1952 2  | 85                    | 12.11 (1.32)                                   | 14.03 (0.57)                                   | 1083                              | 0.125                          | 0.111                          | 0.118                                       |
| CC-1952 3  | 85                    | 12.18 (1.43)                                   | 13.79 (0.24)                                   | 1077                              | 0.124                          | 0.188                          | 0.156                                       |
| CC-1952 4  | 85                    | 9.57 (0.44)                                    | 10.77 (0.31)                                   | 954                               | 0.072                          | 0.093                          | 0.082                                       |
| CC-1952 5  | 58                    | 11.09 (*)                                      | 13.66 (*)                                      | 703                               | 0.060                          | 0.043                          | 0.052                                       |
| CC-1952 6  | 85                    | 12.25 (1.35)                                   | 13.28 (0.13)                                   | 1064                              | 0.112                          | 0.116                          | 0.114                                       |
| CC-1952 7  | 85                    | 12.24 (1.42)                                   | 12.71 1.02)                                    | 1048                              | 0.126                          | 0.091                          | 0.108                                       |
| CC-1952 8  | 85                    | 10.64 (*)                                      | 11.86 (*)                                      | 1000                              | 0.063                          | 0.088                          | 0.075                                       |
| CC-1952 9  | 85                    | -                                              | -                                              | -                                 | -                              | -                              | -                                           |
| CC-1952 10 | 85                    | 11.15 (0.55)                                   | 13.26 (0.49)                                   | 1047                              | 0.079                          | 0.107                          | 0.093                                       |
| CC-1952 11 | 85                    | 11.01 (0.37)                                   | 14.02 (0.53)                                   | 1066                              | 0.115                          | 0.091                          | 0.103                                       |
| CC-1952 12 | 85                    | 11.06 (0.75)                                   | 13.19 (0.28)                                   | 1044                              | 0.112                          | 0.141                          | 0.127                                       |
| CC-1952 13 | 84                    | 10.35 (1.19)                                   | 12.47 (0.17)                                   | 1002                              | 0.079                          | 0.083                          | 0.081                                       |
| CC-1952 14 | 85                    | 12.78 (1.25)                                   | 13.73 (0.05)                                   | 1085                              | 0.079                          | 0.089                          | 0.084                                       |
| CC-1952 15 | 84                    | 12.55 1.59)                                    | 13.03 (0.51)                                   | 1049                              | 0.156                          | 0.157                          | 0.156                                       |

| Line       | Total transfers of MA | Number of generations on plates in 4 days (se) | Number of generations on plates in 5 days (se) | Total estimated generations of MA | $\mu_{\max}$ 1st fitness assay | $\mu_{\max}$ 2nd fitness assay | Average $\mu_{\max}$ of both fitness assays |
|------------|-----------------------|------------------------------------------------|------------------------------------------------|-----------------------------------|--------------------------------|--------------------------------|---------------------------------------------|
| 2342 Anc   | 0                     | 12.72 (0.06)                                   | 13.46 (0.81)                                   | 0                                 | 0.153                          | 0.130                          | 0.142                                       |
| CC-2342 1  | 85                    | 12.39 (0.01)                                   | 13.75 (0.34)                                   | 1109                              | 0.121                          | 0.108                          | 0.114                                       |
| CC-2342 2  | 85                    | -                                              | -                                              | -                                 | -                              | -                              | -                                           |
| CC-2342 3  | 83                    | 10.68 (0.30)                                   | 13.36 (0.59)                                   | 1048                              | -                              | 0.095                          | 0.095                                       |
| CC-2342 4  | 85                    | 12.12 (0.09)                                   | 13.34 (0.35)                                   | 1093                              | 0.179                          | 0.109                          | 0.144                                       |
| CC-2342 5  | 84                    | 12.77 (0.69)                                   | 14.42 (0.14)                                   | 1121                              | -                              | 0.120                          | 0.120                                       |
| CC-2342 6  | 85                    | -                                              | -                                              | -                                 | -                              | -                              | -                                           |
| CC-2342 7  | 85                    | 11.90 (0.26)                                   | 14.63 (0.55)                                   | 1126                              | -                              | 0.095                          | 0.095                                       |
| CC-2342 8  | 50                    | 7.92 (0.47)                                    | 11.10 (0.74)                                   | 562                               | -                              | 0.054                          | 0.054                                       |
| CC-2342 9  | 73                    | 12.02 (1.12)                                   | 14.35 (0.33)                                   | 959                               | 0.126                          | 0.102                          | 0.114                                       |
| CC-2342 10 | 85                    | 12.70 (0.47)                                   | 14.35 (0.13)                                   | 1130                              | 0.052                          | 0.130                          | 0.091                                       |
| CC-2342 11 | 85                    | 12.16 (0.52)                                   | 13.88 (0.78)                                   | 1109                              | 0.126                          | 0.132                          | 0.129                                       |
| CC-2342 12 | 75                    | 8.04 (*)                                       | 9.96 (0.50)                                    | 826                               | 0.034                          | 0.080                          | 0.057                                       |
| CC-2342 13 | 85                    | 12.05 (0.01)                                   | 14.62 (1.03)                                   | 1128                              | 0.090                          | 0.098                          | 0.094                                       |
| CC-2342 14 | 84                    | 12.02 (0.29)                                   | 13.76 (0.27)                                   | 1091                              | -                              | 0.104                          | 0.104                                       |
| CC-2342 15 | 85                    | 11.83 (0.43)                                   | 14.50 (1.37)                                   | 1122                              | 0.162                          | 0.140                          | 0.151                                       |

| Line       | Total transfers of MA | Number of generations on plates in 4 days (se) | Number of generations on plates in 5 days (se) | Total estimated generations of MA | $\mu_{\max}$ 1st fitness assay | $\mu_{\max}$ 2nd fitness assay | Average $\mu_{\max}$ of both fitness assays |
|------------|-----------------------|------------------------------------------------|------------------------------------------------|-----------------------------------|--------------------------------|--------------------------------|---------------------------------------------|
| 2344 Anc   | 0                     | 11.39 (0.15)                                   | 12.64 (0.09)                                   | 0                                 | 0.107                          | 0.114                          | 0.110                                       |
| CC-2344 1  | 84                    | 10.26 (0.28)                                   | 11.40 (0.31)                                   | 912                               | 0.079                          | 0.063                          | 0.071                                       |
| CC-2344 2  | 84                    | 10.61 (0.31)                                   | 11.61 (0.21)                                   | 923                               | 0.130                          | 0.093                          | 0.112                                       |
| CC-2344 3  | 84                    | 12.12 (0.35)                                   | 13.62 (0.49)                                   | 1000                              | 0.065                          | 0.124                          | 0.094                                       |
| CC-2344 4  | 79                    | 9.30 (0.32)                                    | 10.23 (0.32)                                   | 809                               | 0.047                          | 0.064                          | 0.055                                       |
| CC-2344 5  | 83                    | 11.12 (0.13)                                   | 13.04 (0.74)                                   | 958                               | 0.040                          | 0.121                          | 0.081                                       |
| CC-2344 6  | 85                    | 10.91 (0.36)                                   | 12.77 (0.03)                                   | 971                               | 0.083                          | 0.110                          | 0.097                                       |
| CC-2344 7  | 85                    | 11.65 (0.04)                                   | 13.10 (0.28)                                   | 991                               | 0.106                          | 0.154                          | 0.130                                       |
| CC-2344 8  | 85                    | 11.59 (0.35)                                   | 13.81 (0.12)                                   | 1010                              | 0.127                          | 0.122                          | 0.125                                       |
| CC-2344 9  | 85                    | 7.88 (0.38)                                    | 11.91 (2.31)                                   | 901                               | 0.047                          | -                              | 0.047                                       |
| CC-2344 10 | 83                    | 10.72 (0.73)                                   | 11.79 (*)                                      | 917                               | 0.120                          | 0.098                          | 0.109                                       |
| CC-2344 11 | 84                    | 9.27 (0.29)                                    | 11.08 (0.55)                                   | 890                               | -                              | 0.104                          | 0.104                                       |
| CC-2344 12 | 83                    | 11.36 (0.32)                                   | 12.65 (0.38)                                   | 950                               | 0.094                          | 0.094                          | 0.094                                       |
| CC-2344 13 | 85                    | 10.93 (0.04)                                   | 12.43 (0.53)                                   | 961                               | 0.100                          | 0.117                          | 0.108                                       |
| CC-2344 14 | 83                    | 11.31 (0.28)                                   | 12.01 (0.30)                                   | 931                               | 0.145                          | 0.090                          | 0.118                                       |
| CC-2344 15 | 85                    | 11.07 (0.36)                                   | 11.83 (0.26)                                   | 947                               | 0.118                          | 0.078                          | 0.098                                       |

| Line       | Total transfers of MA | Number of generations on plates in 4 days (se) | Number of generations on plates in 5 days (se) | Total estimated generations of MA | $\mu_{\max}$ 1st fitness assay | $\mu_{\max}$ 2nd fitness assay | Average $\mu_{\max}$ of both fitness assays |
|------------|-----------------------|------------------------------------------------|------------------------------------------------|-----------------------------------|--------------------------------|--------------------------------|---------------------------------------------|
| 2931 Anc   | 0                     | 12.06 (0.27)                                   | 13.48 (*)                                      | 0                                 | 0.166                          | 0.130                          | 0.148                                       |
| CC-2931 1  | 84                    | 11.42 (0.15)                                   | 13.44 (0.23)                                   | 1050                              | 0.141                          | 0.120                          | 0.131                                       |
| CC-2931 2  | 85                    | 11.49 (0.07)                                   | 13.24 (0.45)                                   | 1057                              | 0.096                          | 0.113                          | 0.104                                       |
| CC-2931 3  | 82                    | 10.89 (0.13)                                   | 12.88 (0.21)                                   | 1000                              | 0.128                          | 0.123                          | 0.126                                       |
| CC-2931 4  | 83                    | 11.54 (0.01)                                   | 12.48 (0.07)                                   | 1011                              | 0.129                          | 0.125                          | 0.127                                       |
| CC-2931 5  | 84                    | 10.60 (1.15)                                   | 11.84 (1.18)                                   | 994                               | 0.105                          | 0.078                          | 0.091                                       |
| CC-2931 6  | 85                    | 11.94 (0.64)                                   | 13.94 (0.20)                                   | 1083                              | 0.142                          | 0.125                          | 0.134                                       |
| CC-2931 7  | 85                    | 11.69 (1.33)                                   | 13.51 (0.26)                                   | 1067                              | 0.159                          | 0.147                          | 0.153                                       |
| CC-2931 8  | 86                    | -                                              | -                                              | -                                 | -                              | 0.023                          | 0.023                                       |
| CC-2931 9  | 85                    | 11.24 (0.22)                                   | 14.18 (0.79)                                   | 1079                              | 0.152                          | 0.129                          | 0.141                                       |
| CC-2931 10 | 85                    | 12.64 (0.65)                                   | 14.09 (1.24)                                   | 1098                              | 0.104                          | 0.105                          | 0.104                                       |
| CC-2931 11 | 85                    | 11.72 (0.11)                                   | 11.84 (0.43)                                   | 1021                              | 0.151                          | 0.111                          | 0.131                                       |
| CC-2931 12 | 81                    | 6.70 (*)                                       | 7.59 (*)                                       | 787                               | -                              | 0.033                          | 0.033                                       |
| CC-2931 13 | 84                    | 11.13 (0.11)                                   | 13.28 (0.07)                                   | 1041                              | 0.121                          | 0.122                          | 0.121                                       |
| CC-2931 14 | 84                    | 11.32 (0.13)                                   | 12.28 (0.67)                                   | 1016                              | 0.122                          | 0.100                          | 0.111                                       |
| CC-2931 15 | 84                    | 10.76 (1.45)                                   | 13.86 (0.15)                                   | 1053                              | 0.117                          | 0.118                          | 0.118                                       |

| Line       | Total transfers of MA | Number of generations on plates in 4 days (se) | Number of generations on plates in 5 days (se) | Total estimated generations of MA | $\mu_{\max}$ 1st fitness assay | $\mu_{\max}$ 2nd fitness assay | Average $\mu_{\max}$ of both fitness assays |
|------------|-----------------------|------------------------------------------------|------------------------------------------------|-----------------------------------|--------------------------------|--------------------------------|---------------------------------------------|
| 2937 Anc   | 0                     | 12.14 (0.27)                                   | 13.94 (0.34)                                   | 0                                 | 0.065                          | 0.110                          | 0.088                                       |
| CC-2937 1  | 75                    | 11.29 (0.83)                                   | 13.73 (0.38)                                   | 925                               | 0.130                          | 0.138                          | 0.134                                       |
| CC-2937 2  | 81                    | 11.68 (0.19)                                   | 13.06 (0.36)                                   | 991                               | 0.114                          | 0.112                          | 0.113                                       |
| CC-2937 3  | 81                    | 12.23 (0.78)                                   | 12.96 (0.39)                                   | 996                               | 0.145                          | 0.096                          | 0.121                                       |
| CC-2937 4  | 81                    | 11.92 (0.90)                                   | 13.97 (0.56)                                   | 1019                              | 0.117                          | 0.101                          | 0.109                                       |
| CC-2937 5  | 78                    | 11.79 (0.37)                                   | 12.96 (0.17)                                   | 951                               | 0.108                          | 0.094                          | 0.101                                       |
| CC-2937 6  | 79                    | 11.58 (0.60)                                   | 13.62 (1.10)                                   | 977                               | 0.144                          | 0.096                          | 0.120                                       |
| CC-2937 7  | 79                    | 11.13 (0.58)                                   | 12.98 (0.03)                                   | 954                               | 0.098                          | 0.071                          | 0.085                                       |
| CC-2937 8  | 39                    | 9.10 (0.52)                                    | 11.17 (0.09)                                   | 404                               | 0.063                          | 0.079                          | 0.071                                       |
| CC-2937 9  | 77                    | 12.25 (0.42)                                   | 13.85 (0.35)                                   | 967                               | 0.122                          | 0.121                          | 0.122                                       |
| CC-2937 10 | 78                    | 11.33 (0.82)                                   | 13.10 (0.04)                                   | 949                               | 0.111                          | 0.099                          | 0.105                                       |
| CC-2937 11 | 77                    | 11.52 (0.37)                                   | 13.80 (0.40)                                   | 956                               | 0.133                          | 0.102                          | 0.117                                       |
| CC-2937 12 | 81                    | 10.34 (0.57)                                   | 13.36 (*)                                      | 981                               | 0.147                          | 0.143                          | 0.145                                       |
| CC-2937 13 | 83                    | 10.22 (0.64)                                   | 11.97 (0.44)                                   | 965                               | 0.113                          | 0.123                          | 0.118                                       |
| CC-2937 14 | 79                    | 12.07 (0.77)                                   | 13.61 (0.84)                                   | 984                               | -                              | 0.088                          | 0.088                                       |
| CC-2937 15 | 79                    | 10.08 (0.68)                                   | 12.05 (*)                                      | 916                               | 0.102                          | 0.100                          | 0.101                                       |

**Table S2**

Summary of estimates of numbers of generations undergone by each strain between transfers and over the entire MA experiment including CC-1373. Estimates are shown for three, four and five day transfer periods for the ancestors. The three day transfer period was only used in the early part of the study, and so three days measures were not made on the MA lines.

| <b>Strain</b>  | <b>Number of generations of ancestor in 3 days</b> | <b>Number of generations of ancestor in 4 days</b> | <b>Number of generations of ancestor in 5 days</b> | <b>Average number of generations of MA lines in 4 days (95% CIs)</b> | <b>Average number of generations of MA lines in 5 days (95% CIs)</b> | <b>Total number of generations of MA (95% CIs)</b> |
|----------------|----------------------------------------------------|----------------------------------------------------|----------------------------------------------------|----------------------------------------------------------------------|----------------------------------------------------------------------|----------------------------------------------------|
| <b>CC-1373</b> | 7.11                                               | 6.47                                               | 10.20                                              | 7.95<br>(7.36, 8.53)                                                 | 10.28<br>(9.71, 10.84)                                               | 679.89<br>(597.75, 762.02)                         |
| <b>CC-1952</b> | 8.68                                               | 12.39                                              | 14.34                                              | 11.49<br>(11.00, 11.98)                                              | 13.12<br>(12.63, 13.60)                                              | 1021.12<br>(969.37, 1072.88)                       |
| <b>CC-2342</b> | 10.90                                              | 12.72                                              | 13.46                                              | 11.43<br>(10.55, 12.31)                                              | 13.54<br>(12.76, 14.31)                                              | 1032.65<br>(942.31, 1122.98)                       |
| <b>CC-2344</b> | 7.54                                               | 11.39                                              | 12.64                                              | 10.67<br>(10.11, 11.23)                                              | 12.22<br>(11.73, 12.71)                                              | 938.10<br>(912.50, 963.69)                         |
| <b>CC-2931</b> | 9.50                                               | 12.06                                              | 13.48                                              | 11.08<br>(10.36, 11.79)                                              | 12.75<br>(11.87, 13.63)                                              | 1025.59<br>(985.90, 1065.28)                       |
| <b>CC-2937</b> | 8.17                                               | 12.15                                              | 13.94                                              | 11.24<br>(10.77, 11.70)                                              | 13.08<br>(12.67, 13.48)                                              | 929.07<br>(854.31, 1003.83)                        |

**Table S3**

Summary of estimates of mutational variance for fitness assays including CC-1373. Separate columns show estimates from the 1<sup>st</sup> and 2<sup>nd</sup> replicate assays (Anc = ancestor, MA= mutation accumulation lines).

Table S3

| Strain         | Variance<br>(95% CIs)                                                            |                                                                               |                                                                                  |                                                                               | F-ratio test           |                        | $\Delta V$            |                       | $\Delta V$ per<br>generation<br>= $V_m$ |                       | $CV_m$ Ancestor<br>(% per<br>generation) |      | $CV_m$ MA<br>(% per<br>generation) |      |
|----------------|----------------------------------------------------------------------------------|-------------------------------------------------------------------------------|----------------------------------------------------------------------------------|-------------------------------------------------------------------------------|------------------------|------------------------|-----------------------|-----------------------|-----------------------------------------|-----------------------|------------------------------------------|------|------------------------------------|------|
|                | 1st<br>Anc                                                                       | 1st<br>MA                                                                     | 2nd<br>Anc                                                                       | 2nd<br>MA                                                                     | 1st                    | 2nd                    | 1st                   | 2nd                   | 1st                                     | 2nd                   | 1st                                      | 2nd  | 1st                                | 2nd  |
| <b>CC-1373</b> | 0<br>(0, 0)                                                                      | $3.34 \times 10^{-4}$<br>( $1.72 \times 10^{-4}$ ,<br>$9.1 \times 10^{-4}$ )  | $5.28 \times 10^{-5}$<br>( $2.41 \times 10^{-5}$ ,<br>$1.94 \times 10^{-4}$ )    | $1.22 \times 10^{-4}$<br>( $6.28 \times 10^{-5}$ ,<br>$3.33 \times 10^{-4}$ ) | NA*                    | 2.31                   | $3.34 \times 10^{-4}$ | $6.92 \times 10^{-5}$ | $4.91 \times 10^{-7}$                   | $1.02 \times 10^{-7}$ | 0.86                                     | 0.46 | 0.89                               | 0.41 |
| <b>CC-1952</b> | 0<br>(0,0)                                                                       | $6.93 \times 10^{-4}$<br>( $3.56 \times 10^{-4}$ ,<br>$1.89 \times 10^{-3}$ ) | $6.99 \times 10^{-5}$<br>( $3.19 \times 10^{-5}$ ,<br>$2.57 \times 10^{-4}$ )    | $5.99 \times 10^{-4}$<br>( $3.15 \times 10^{-4}$ ,<br>$1.55 \times 10^{-3}$ ) | NA*                    | 8.57*                  | $6.93 \times 10^{-4}$ | $5.29 \times 10^{-4}$ | $6.79 \times 10^{-7}$                   | $5.18 \times 10^{-7}$ | 0.54                                     | 0.55 | 0.82                               | 0.66 |
| <b>CC-2342</b> | $2.86 \times 10^{-17}$<br>( $1.30 \times 10^{-17}$ ,<br>$1.05 \times 10^{-16}$ ) | $1.47 \times 10^{-3}$<br>( $6.42 \times 10^{-4}$ ,<br>$6.08 \times 10^{-3}$ ) | $2.43 \times 10^{-4}$<br>( $1.11 \times 10^{-4}$ ,<br>$8.90 \times 10^{-4}$ )    | $9.82 \times 10^{-4}$<br>( $5.16 \times 10^{-4}$ ,<br>$2.55 \times 10^{-3}$ ) | $5.14 \times 10^{13*}$ | 4.04*                  | $1.47 \times 10^{-3}$ | $7.39 \times 10^{-4}$ | $1.42 \times 10^{-6}$                   | $7.16 \times 10^{-7}$ | 0.78                                     | 0.65 | 1.06                               | 0.85 |
| <b>CC-2344</b> | 0<br>(0,0)                                                                       | $6.3 \times 10^{-4}$<br>( $3.31 \times 10^{-4}$ ,<br>$1.64 \times 10^{-3}$ )  | 0<br>(0,0)                                                                       | $1.09 \times 10^{-4}$<br>( $5.75 \times 10^{-5}$ ,<br>$2.84 \times 10^{-4}$ ) | NA*                    | NA*                    | $6.30 \times 10^{-4}$ | $1.09 \times 10^{-4}$ | $6.72 \times 10^{-7}$                   | $1.16 \times 10^{-7}$ | 0.77                                     | 0.30 | 0.89                               | 0.32 |
| <b>CC-2931</b> | $5.24 \times 10^{-17}$<br>( $2.39 \times 10^{-17}$ ,<br>$1.93 \times 10^{-16}$ ) | $1.06 \times 10^{-4}$<br>( $5.46 \times 10^{-5}$ ,<br>$2.89 \times 10^{-4}$ ) | $1.99 \times 10^{-4}$<br>( $9.07 \times 10^{-5}$ ,<br>$7.30 \times 10^{-4}$ )    | $7.76 \times 10^{-4}$<br>( $4.16 \times 10^{-4}$ ,<br>$1.93 \times 10^{-3}$ ) | $2.02 \times 10^{12*}$ | 3.9*                   | $1.06 \times 10^{-4}$ | $5.77 \times 10^{-4}$ | $1.03 \times 10^{-7}$                   | $5.63 \times 10^{-7}$ | 0.19                                     | 0.58 | 0.25                               | 0.71 |
| <b>CC-2937</b> | -                                                                                | -                                                                             | $7.15 \times 10^{-21}$<br>( $3.26 \times 10^{-21}$ ,<br>$2.62 \times 10^{-20}$ ) | $2.91 \times 10^{-4}$<br>( $1.56 \times 10^{-4}$ ,<br>$7.24 \times 10^{-4}$ ) | -                      | $4.07 \times 10^{16*}$ | -                     | $2.91 \times 10^{-4}$ | -                                       | $3.13 \times 10^{-7}$ | -                                        | 0.51 | -                                  | 0.54 |

<sup>1</sup> among MA line variance component.

<sup>2</sup> ancestral among pseudoline variance component divided by the between line MA variance component; the critical value = 3.006 with df 15,9 (\* = significant difference at the 5% level between MA and ancestral variance).

<sup>3</sup> change in the among line variance component of fitness between the MA lines and their ancestors.

<sup>4</sup> Mutational heritability calculated as  $\Delta V$ /number of generations.

<sup>5</sup> coefficients of mutational variance calculated as the square root of  $\Delta V$  per generation divided by the mean fitness of the ancestral lines

<sup>6</sup> coefficients of mutational variance calculated as the square root of  $\Delta V$  per generation divided by the mean fitness of the MA lines

**Table S4**

Estimates of fitness and mutational parameters from the fitness assays including CC-1373. Separate columns show estimates from the 1<sup>st</sup> and 2<sup>nd</sup> replicate assays.

| Strain         | Fitness<br>(95% CIs)       |                            |                            |                            | $\Delta M$ ( $\times 10^{-3}$ ) per<br>generation <sup>1</sup><br>(95% CIs ( $\times 10^{-3}$ )) |                               | $U^2$<br>(se)                                      |                                                    | $E(a)^3$<br>(se)                                    |                                                     |
|----------------|----------------------------|----------------------------|----------------------------|----------------------------|--------------------------------------------------------------------------------------------------|-------------------------------|----------------------------------------------------|----------------------------------------------------|-----------------------------------------------------|-----------------------------------------------------|
|                | 1st<br>Anc                 | 1st<br>MA                  | 2nd<br>Anc                 | 2nd<br>MA                  | 1st                                                                                              | 2nd                           | 1st                                                | 2nd                                                | 1st                                                 | 2nd                                                 |
| <b>CC-1373</b> | 0.082<br>(0.068,<br>0.096) | 0.079<br>(0.068,<br>0.090) | 0.069<br>(0.058,<br>0.081) | 0.078<br>(0.066,<br>0.090) | -0.007<br>(-0.031,<br>+0.017)                                                                    | +0.018<br>(-0.006,<br>+0.042) | $1.01 \times 10^{-4}$<br>( $1.53 \times 10^{-4}$ ) | *                                                  | $-6.98 \times 10^{-2}$<br>( $6.77 \times 10^{-2}$ ) | $+5.71 \times 10^{-3}$<br>( $5.54 \times 10^{-3}$ ) |
| <b>CC-1952</b> | 0.153<br>(0.127,<br>0.178) | 0.100<br>(0.079,<br>0.121) | 0.130<br>(0.102,<br>0.158) | 0.108<br>(0.071,<br>0.145) | -0.051<br>(-0.071,<br>-0.031)                                                                    | -0.019<br>(-0.036,<br>-0.002) | $3.86 \times 10^{-3}$<br>( $4.55 \times 10^{-3}$ ) | $7.08 \times 10^{-4}$<br>( $1.07 \times 10^{-3}$ ) | $-1.33 \times 10^{-2}$<br>( $1.29 \times 10^{-2}$ ) | $-2.70 \times 10^{-2}$<br>( $2.62 \times 10^{-2}$ ) |
| <b>CC-2342</b> | 0.153<br>(0.138,<br>0.168) | 0.112<br>(0.061,<br>0.163) | 0.130<br>(0.112,<br>0.148) | 0.099<br>(0.078,<br>0.120) | -0.042<br>(-0.066,<br>-0.018)                                                                    | -0.017<br>(-0.034,<br>0.001)  | $1.26 \times 10^{-3}$<br>( $1.91 \times 10^{-3}$ ) | $4.27 \times 10^{-4}$<br>( $6.46 \times 10^{-4}$ ) | $-3.36 \times 10^{-2}$<br>( $3.26 \times 10^{-2}$ ) | $-4.09 \times 10^{-2}$<br>( $3.97 \times 10^{-2}$ ) |
| <b>CC-2344</b> | 0.107<br>(0.089,<br>0.125) | 0.092<br>(0.062,<br>0.121) | 0.114<br>(0.100,<br>0.128) | 0.105<br>(0.086,<br>0.124) | -0.016<br>(-0.036,<br>+0.004)                                                                    | -0.011<br>(-0.030,<br>+0.007) | $3.71 \times 10^{-4}$<br>( $5.61 \times 10^{-4}$ ) | $1.13 \times 10^{-3}$<br>( $1.71 \times 10^{-3}$ ) | $-4.26 \times 10^{-2}$<br>( $4.13 \times 10^{-2}$ ) | $-1.01 \times 10^{-2}$<br>( $9.80 \times 10^{-2}$ ) |
| <b>CC-2931</b> | 0.166<br>(0.145,<br>0.187) | 0.129<br>(0.110,<br>0.148) | 0.130<br>(0.111,<br>0.149) | 0.106<br>(0.088,<br>0.124) | -0.036<br>(-0.055,<br>-0.016)                                                                    | -0.017<br>(-0.034,<br>0.000)  | $1.22 \times 10^{-2}$<br>( $1.84 \times 10^{-2}$ ) | $5.02 \times 10^{-4}$<br>( $7.59 \times 10^{-4}$ ) | $-2.91 \times 10^{-3}$<br>( $2.72 \times 10^{-3}$ ) | $-3.35 \times 10^{-2}$<br>( $3.25 \times 10^{-2}$ ) |
| <b>CC-2937</b> | -                          | -                          | 0.109<br>(0.098,<br>0.121) | 0.104<br>(0.090,<br>0.118) | -                                                                                                | -0.003<br>(-0.021,<br>+0.014) | -                                                  | $3.13 \times 10^{-5}$<br>( $4.73 \times 10^{-5}$ ) | -                                                   | $-9.16 \times 10^{-2}$<br>( $8.89 \times 10^{-2}$ ) |



- <sup>1</sup> change in mean fitness per generation between the ancestral pseudolines (Anc) and the MA lines (MA) for each strain.
- <sup>2</sup> Bateman-Mukai estimates of the genomic deleterious mutation rate per generation, se calculated using the delta method
- <sup>3</sup> Bateman-Mukai estimates of the mean mutational effect per generation, se calculated using the delta method.

**Table S5.** Coefficient of mutation variance ( $CV_m$ ) and genomic properties of model organisms used for MA experiments. The organisms listed are those for which genomic and phenotypic outcomes of MA are available. The figures reported for  $CV_m$  are the mean value for each species as summarised in Halligan and Keightley (2009 and references therein). Using available estimates of the mutation rate, genome size and, proteome size we calculate the variance in fitness contributed per mutation.

| Organism                                    | $\mu$<br>(/bp*gen.)    | genome<br>size (bp) | Coding<br>positions <sup>1</sup> | Ploidy | cell<br>div. /<br>gen. <sup>2</sup> | Mut. /<br>div. *<br>genome | Mut./div.*<br>proteome | $CV_m$ | $CV_m /$<br>div. | $CV_m /$<br>genome<br>*mut. | $CV_m /$<br>proteome<br>*mut. |
|---------------------------------------------|------------------------|---------------------|----------------------------------|--------|-------------------------------------|----------------------------|------------------------|--------|------------------|-----------------------------|-------------------------------|
| <i>Arabidopsis thaliana</i>                 | $6.50 \times 10^{-9}$  | 157,000,000         | 20,098,557.72                    | 2      | 35                                  | 0.0292                     | 0.0037                 | 4.15   | 0.119            | 4.1                         | 31.8                          |
| <i>Caenorhabditis elegans</i>               | $5.75 \times 10^{-9}$  | 97,000,000          | 15,058,140.93                    | 2      | 9                                   | 0.062                      | 0.0096                 | 1.49   | 0.165            | 2.7                         | 17.2                          |
| <i>Drosophila melanogaster</i> <sup>3</sup> | $4.65 \times 10^{-9}$  | 139,500,000         | 10,649,322.34                    | 2      | 36                                  | 0.018                      | 0.0014                 | 1.54   | 0.043            | 2.4                         | 31.0                          |
| <i>Chlamydomonas reinhardtii</i>            | $2.08 \times 10^{-10}$ | 112,000,000         | 19,641,831.08                    | 1      | 1                                   | 0.0233                     | 0.0041                 | 0.54   | 0.540            | 23.2                        | 132.2                         |
| <i>Saccharomyces cerevisiae</i>             | $3.30 \times 10^{-10}$ | 12,495,682          | 4,357,469.27                     | 1      | 1                                   | 0.0041                     | 0.0014                 | 0.09   | 0.087            | 21.1                        | 60.5                          |
| <i>E. coli</i>                              | $2.60 \times 10^{-10}$ | 4,639,675           | 1,972,335.83                     | 1      | 1                                   | 0.0012                     | 0.0005                 | 0.02   | 0.020            | 16.6                        | 39.0                          |

<sup>1</sup> Proteome sizes were taken from Massey 2008 and references therein. The number of coding positions was estimated as 2/3 of CDS to account for synonymous changes

<sup>2</sup> Cell divisions per generation were taken from Lynch (2010) and references therein.

## References

Lynch, M. 2010. Evolution of the mutation rate. *Trends Genet.* 26:345-352.

Halligan, D. L. and P. D. Keightley. 2009. Spontaneous mutation accumulation studies in evolutionary genetics. Pp. 151-172. *Annual Review of Ecology Evolution and Systematics.*

Massey, S. E. 2008. The Proteomic constraint and its role in molecular evolution. *Mol. Biol. Evol.* 25:2557-2565.
